# Supplementary material
Source: PubMed Central journal article supplement (PMC7015266)
Supplement: NIHMS1068428-supplement-Supplemental_Figures.pdf [file NIHMS1068428-supplement-Supplemental_Figures.pdf]

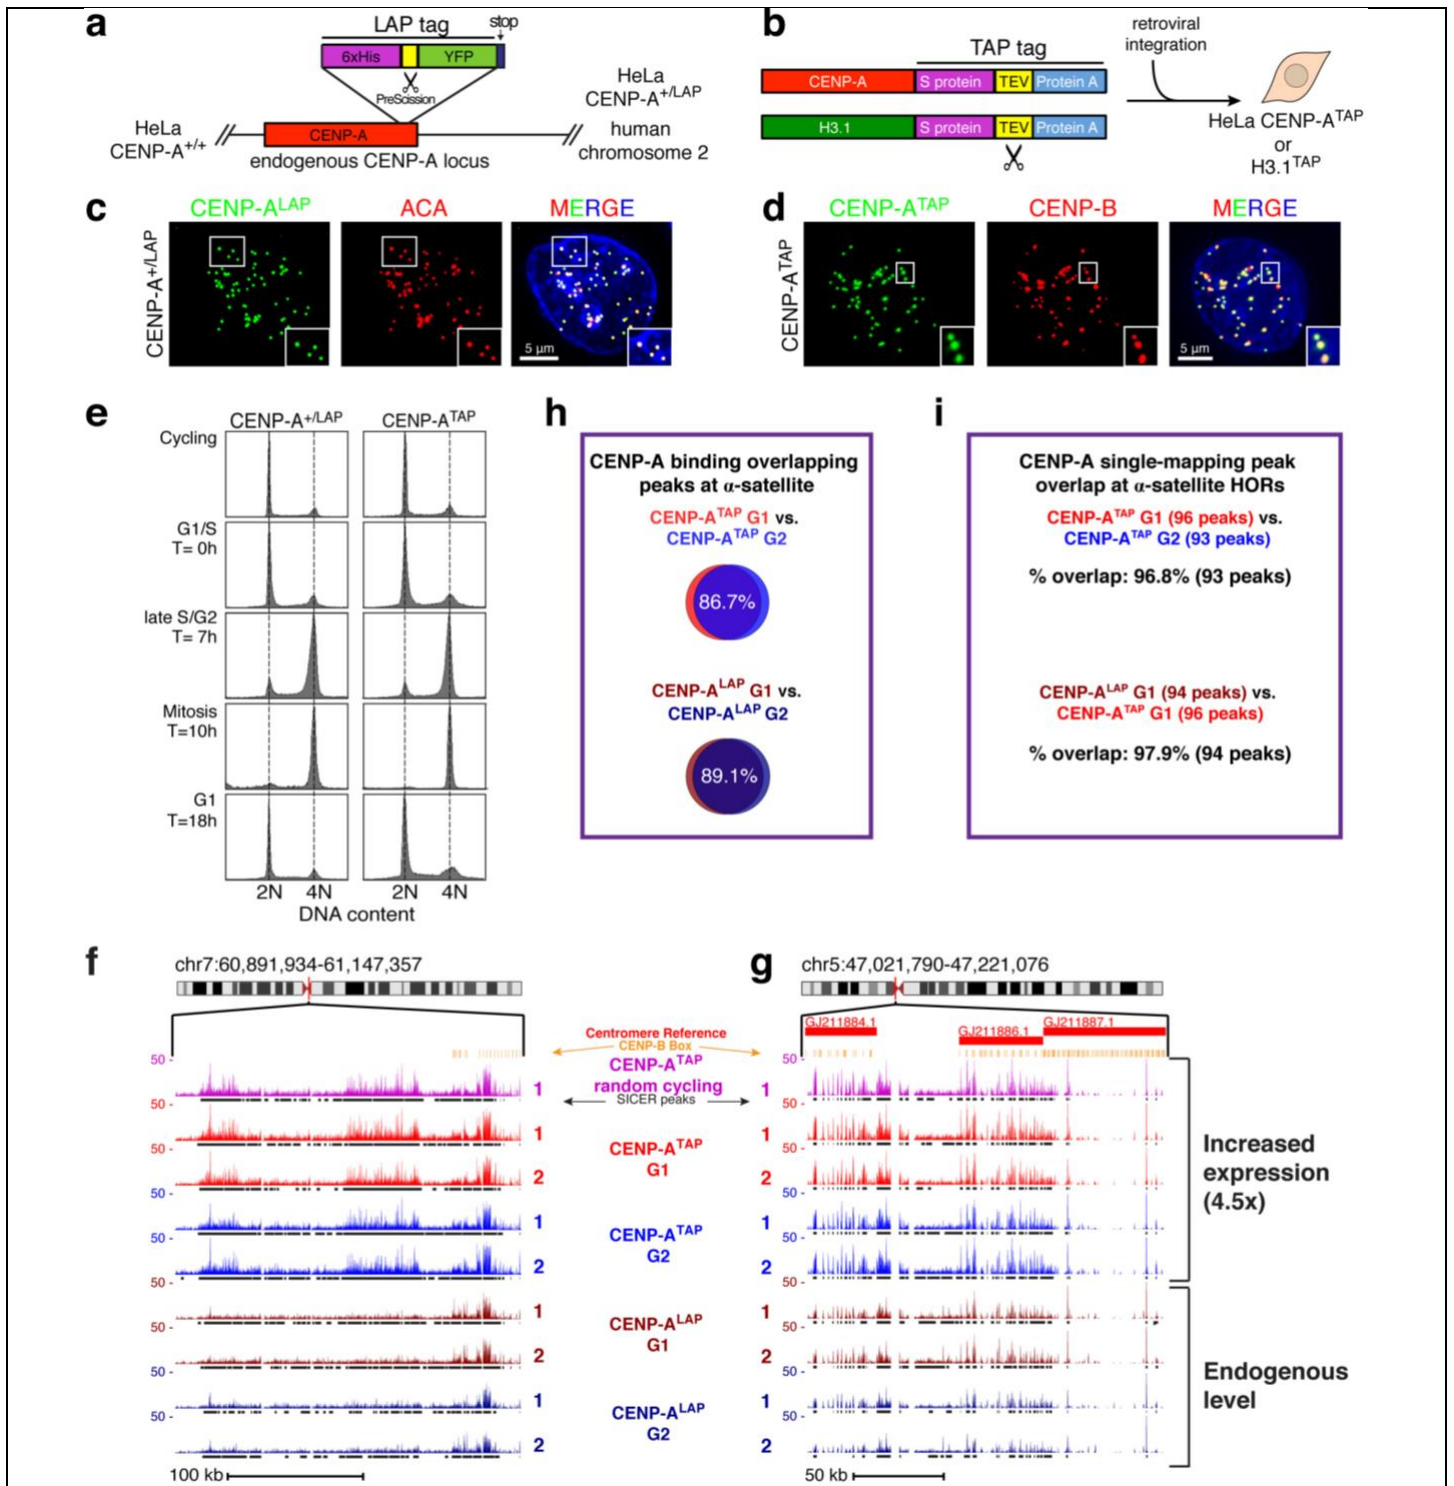

Supplementary Figure 1

Identification of peaks enriched for CENP-A binding.

(a) Scheme showing experimental design for tagging an endogenous CENP-A locus to produce CENP-A<sup>+LAP</sup> HeLa cells. These cells were then adapted to suspension growth. (b) Scheme showing the experimental design for obtaining increased levels of CENP-A<sup>TAP</sup> expression. CENP-A<sup>TAP</sup> is expressed in these cells at 4.5-fold the level of CENP-A in the parental HeLa cells<sup>1</sup>. (c, d) Localization of

endogenously tagged CENP-A<sub>LAP</sub> (c) and CENP-A<sub>TAP</sub> (d) determined with indirect immunofluorescence using anti-GFP antibody (c) or rabbit-IgG (d). Scale bar, 5  $\mu$ m. The experiment was repeated independently three times with similar results for both (c) and (d). (e) FACS analysis of DNA content showing the synchronization efficiency of CENP-A<sub>LAP</sub> and CENP-A<sub>TAP</sub> HeLa cell lines. The experiment was repeated independently five times with similar results. (f, g) Examples of centromeric regions of chromosome 7 (f) and 5 (g) showing increased occupancy of overexpressed CENP-A<sub>TAP</sub> (compare CENP-A<sub>TAP</sub> with CENP-A<sub>LAP</sub>). The experiment was repeated independently twice with similar results. (h) Overlap between G1 and G2 CENP-A binding peaks at  $\alpha$ -satellite sequences. (i) Top, overlap between G1 and G2 CENP-A single mapping binding sites at  $\alpha$ -satellite HOR sequences. Bottom, peak overlap between G1 CENP-A<sub>TAP</sub> (increased expression) and CENP-A<sub>LAP</sub> (endogenous level) single mapping binding sites at  $\alpha$ -satellite HOR sequences.

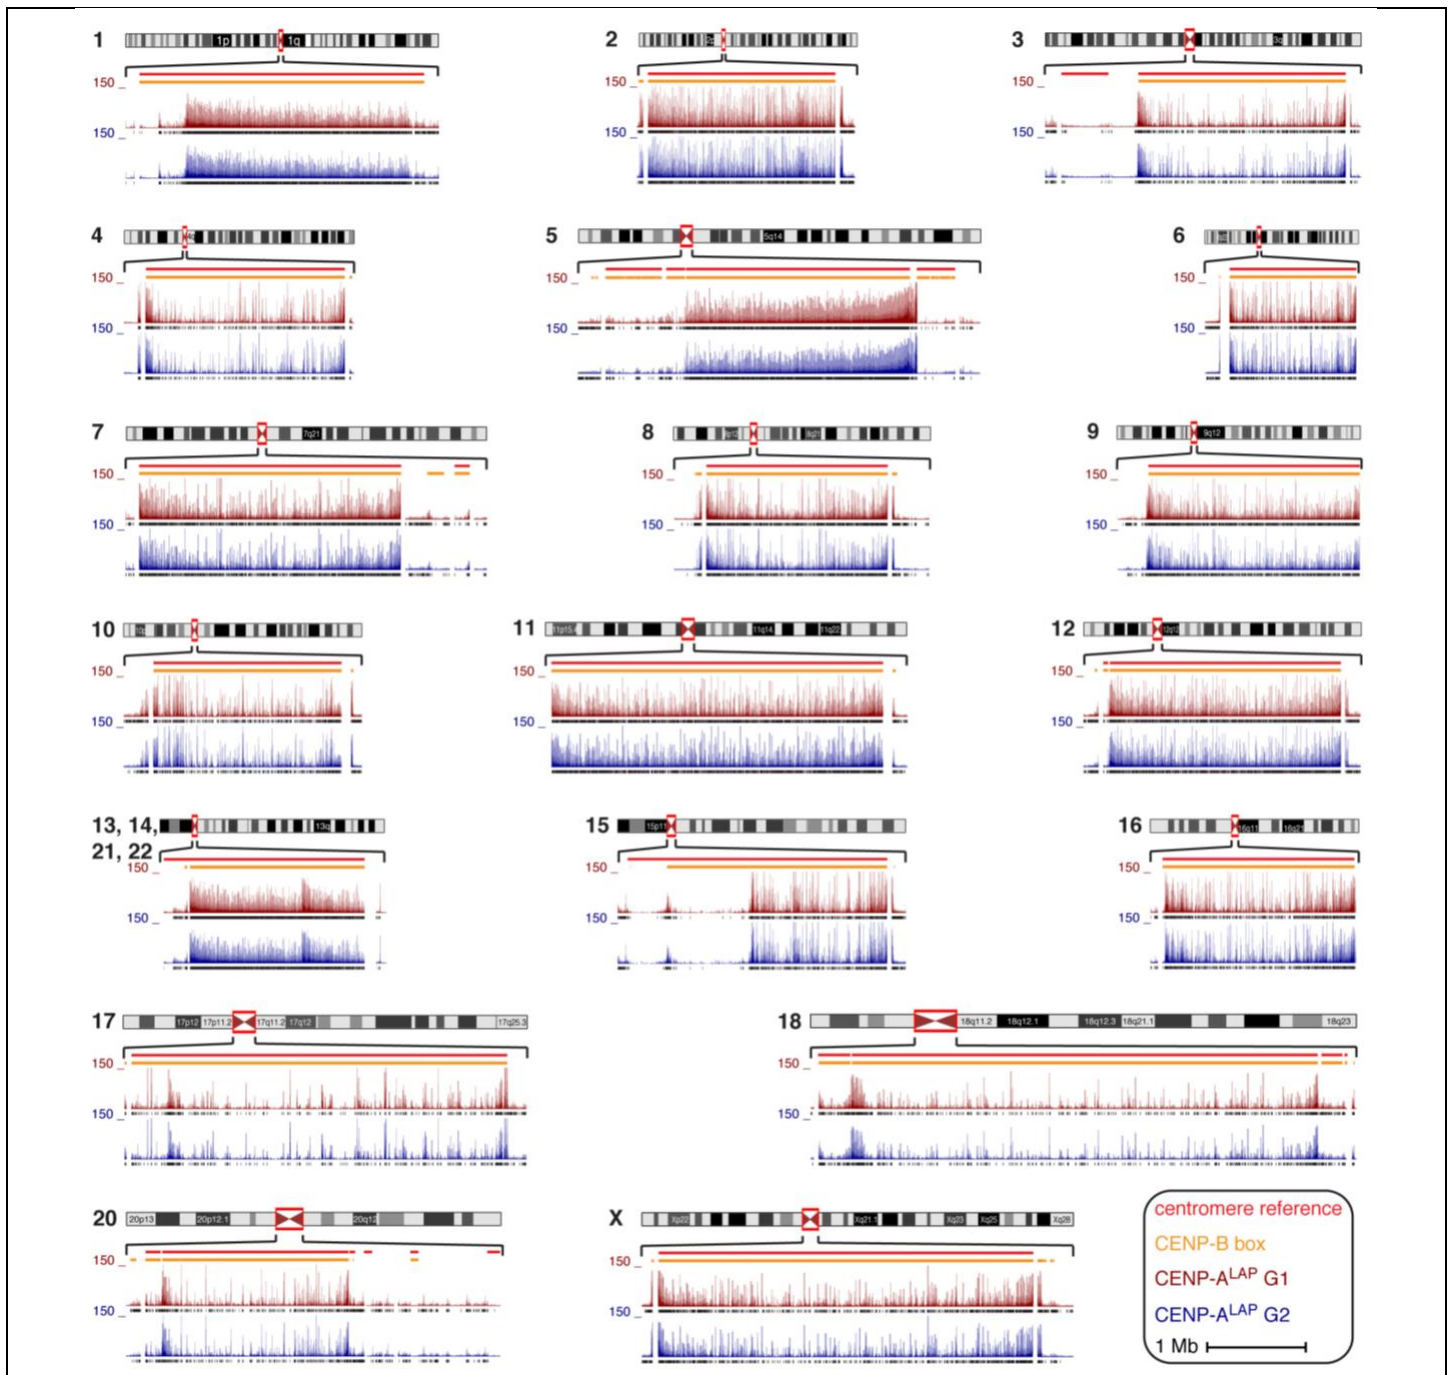

**Supplementary Figure 2**

**CENP-A ChIP-seq identifies CENP-A binding at reference centromeres of 23 human chromosomes.**

CENP-A<sup>LAP</sup> bound DNAs at G1 and G2 were sequenced, with 2 replicates per condition, and mapped to the centromeric reference models in the hg38 assembly<sup>2, 3</sup>. Shown are the raw mapping data (colored) for every human centromere (except for the centromere of chromosome 19 that shares almost all of its  $\alpha$ -satellites arrays with  $\alpha$ -satellites arrays of chromosomes 1 and 5) and CENP-A binding called as SICER peaks (black lines, underneath) for one replicate for each time point. The experiment was repeated twice independently with similar results. Centromere reference location, red. CENP-B box, orange.

**a**

| CENP-A SICER peaks non $\alpha$ -satellite | G1     | G2    | % removal |
|--------------------------------------------|--------|-------|-----------|
| $\geq 5$ -fold                             | 12,550 | 1,260 | 90%       |
| $\geq 10$ -fold                            | 6,536  | 672   | 90%       |
| $\geq 100$ -fold                           | 2      | 0     | 100%      |

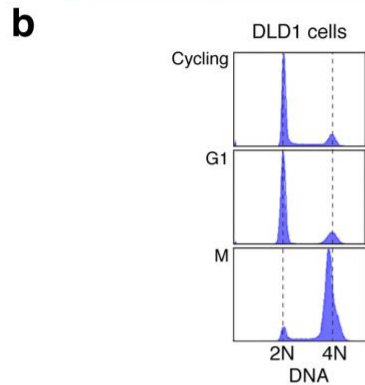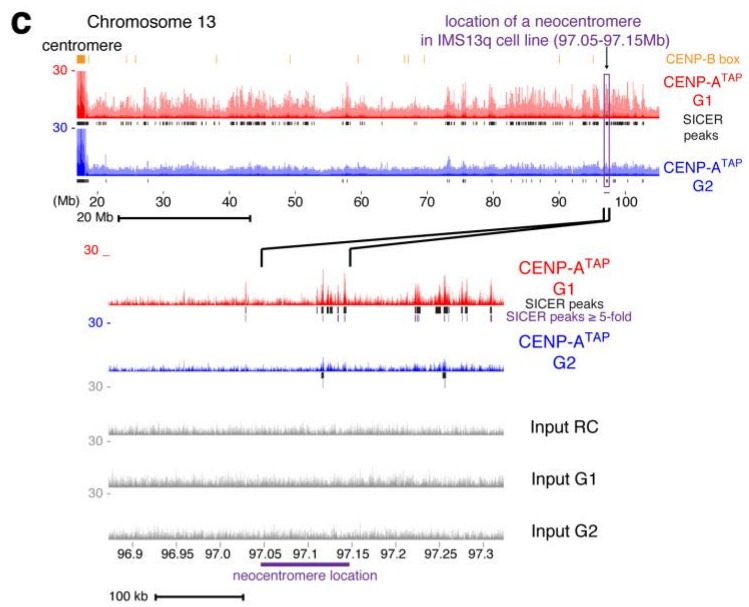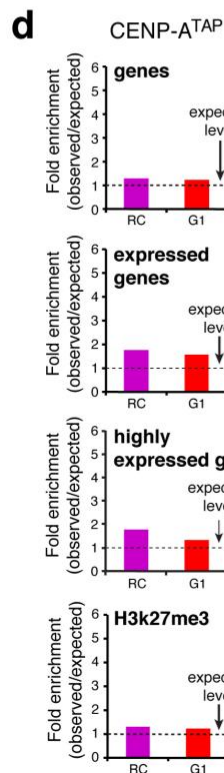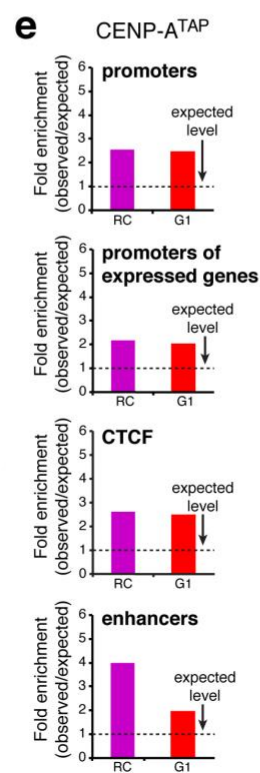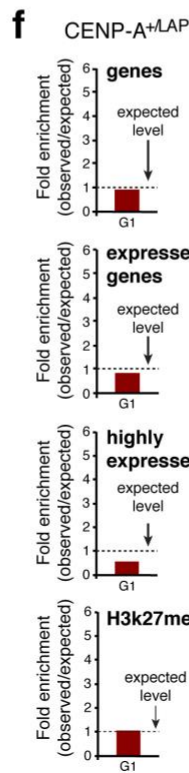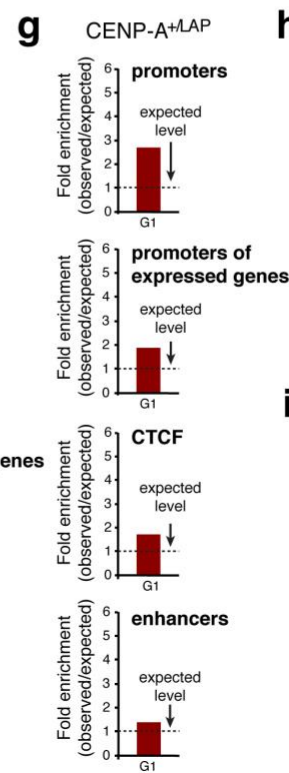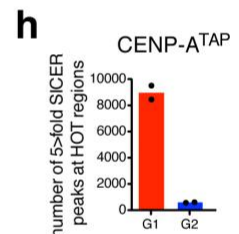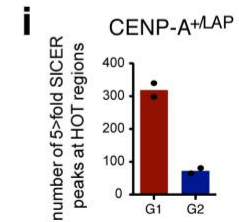

### Supplementary Figure 3

**Ectopic deposition of CENP-A into open and active chromatin at G1 does not function as a seeding hotspot for neocentromere formation.**

(a) Number of non- $\alpha$ -satellite CENP-A SICER binding sites called at G1 or G2 at different fold thresholds (above background). (b) Human DLD1 cells with auxin degradable CENP-A<sup>AID</sup> and a doxycycline-inducible CENP-A<sup>WT</sup> 4, were synchronized at G1 using the CDK4/6 inhibitor PD-0332991 (also known as Palbociclib) or at mitosis using nocodazole, following addition of doxycycline. The experiment was repeated independently three times with similar results. (c) Read mapping data of CENP-A<sup>TAP</sup> ChIP-sequencing at G1 (red) and G2

(blue), at the chromosomal location of a known patient derived neocentromeres found in chromosome 13. The experiment was repeated twice independently with similar results. A third human neocentromere, identified in line MS4221, has been identified to lie within a 400 kb neocentromere at position 86.5 to 86.9 Mb on chromosome 8 in hg19<sup>5,6</sup> (corresponding to 85.78-85.88 Mb in hg38). However, a gap and segmental duplications that appear in this region precluded precise analysis of CENP-A mapping at this neocentromere. **(d-g)** Fold enrichment of CENP-A<sub>TAP</sub> chromatin in randomly cycling cells or at G1 **(d, e)** and CENP-A<sub>LAP</sub> chromatin **(f, g)** at G1 at different genomic locations. SICER peaks  $\geq 5$ -fold supported between two replicates were analyzed for their enrichment level at different genomic locations, compared to the level of enrichment at these sites by chance. **(h, i)** Number of CENP-A<sub>TAP</sub> (h) and CENP-A<sub>LAP</sub> (i) SICER peaks  $\geq 5$ -fold that overlap with 'HOT' regions in the human genome in G1 and G2 synchronized cells. Data shown are from two biologically independent experiments. Source data for d-i can be found in Supplementary Table 4.

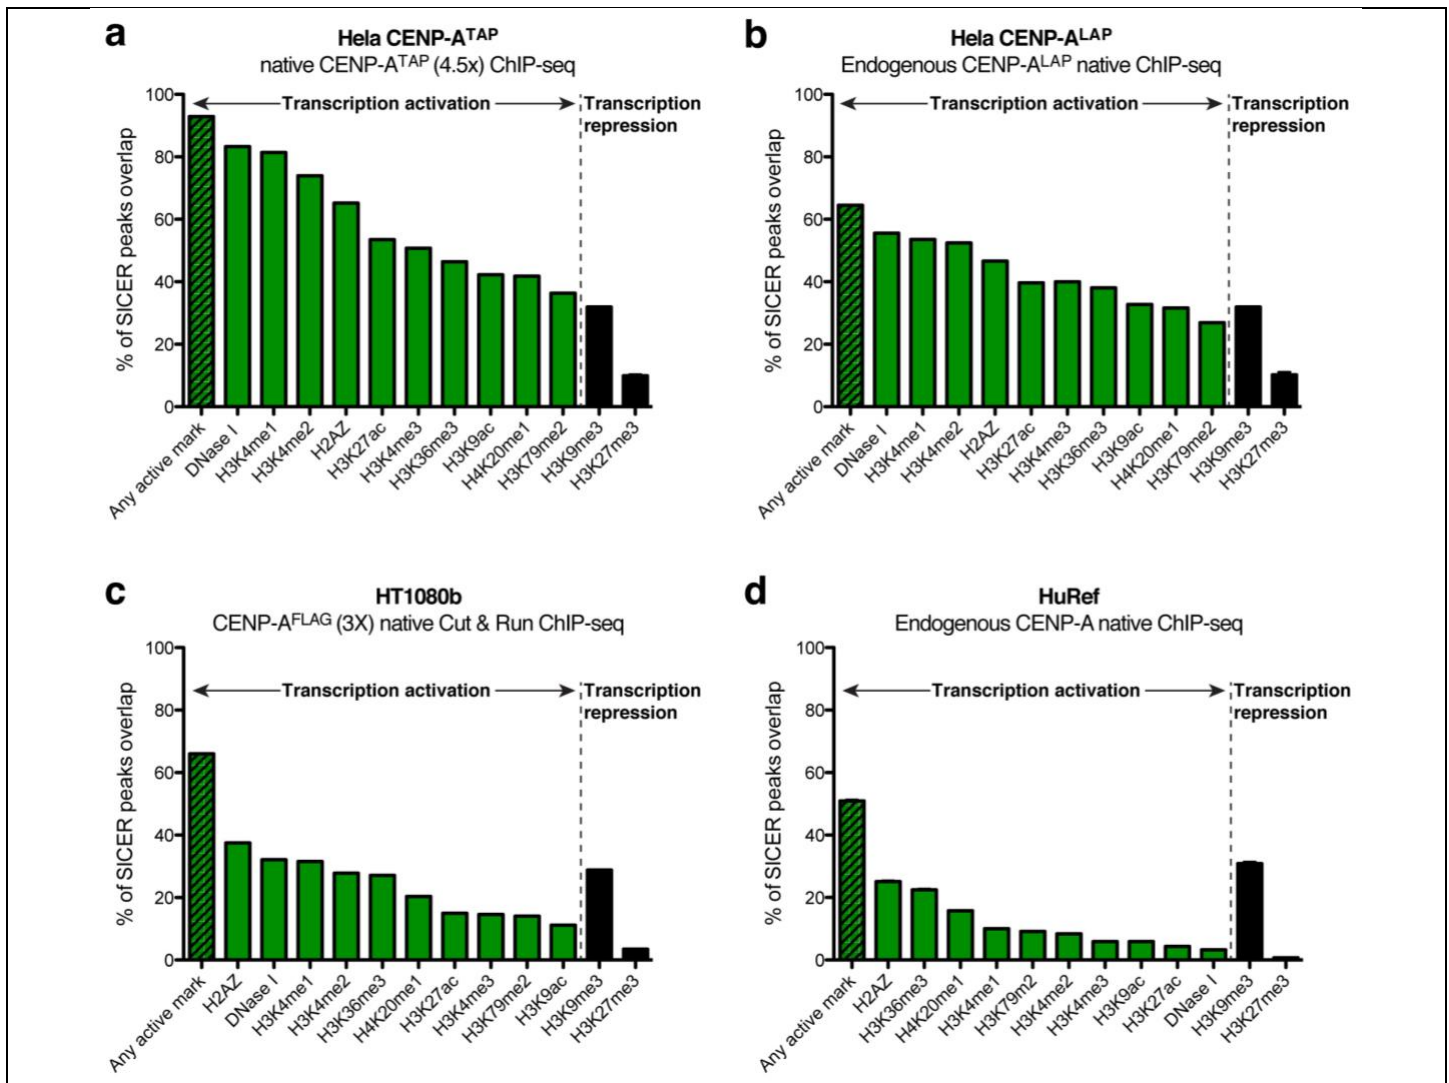

**Supplementary Figure 4**

**Non-centromeric CENP-A binding peaks overlap with active transcription marks.**

(a,b) The chromatin features of CENP-A<sub>TAP</sub> (a) and CENP-A<sub>LAP</sub> (b) non-centromeric preferential sites were analyzed by intersecting SICER peaks  $\geq 5$ -fold supported between two replicates with publicly available ENCODE datasets for histone modification profiles in HeLa-S3, that represent modifications typically associated with transcription activation or repression. The experiment was performed one time, except for DNase I and H3K27me3 for which there are 2 ENCODE datasets available, and therefore for DNase I and H3K27me3 the experiment was repeated twice independently with similar results. Statistics source data for Supplementary Fig 4a,b can be found in Supplementary Table 4. (The sum of ectopic CENP-A<sub>TAP</sub> sites at active or repression marks is more than 100%, the result of overlap between H3K9me3 and active transcription marks.) (c,d) The chromatin features of sites of preferential, non-centromeric CENP-A binding were analyzed for histone modification profiles associated with transcription activation or repression in HeLa-S3 cells by intersecting SICER peaks  $\geq 5$ -fold found in previously published CENP-A ChIP-seq datasets in HT1080<sub>7</sub> (c) and HuRef<sub>8</sub> (d) cell lines with publicly available ENCODE datasets for histone modification profiles in HeLa-S3. For HT1080b (c) the experiment was performed one time, except for DNase I and H3K27me3 for which there are 2 ENCODE datasets available, and therefore for DNase I and H3K27me3 the experiment was repeated twice independently with similar results. For HuRef (d), The experiment was performed four times, except for DNase I and H3K27me3 for which there are 2 ENCODE datasets available, and therefore for DNase I and H3K27me3 the experiment was repeated independently eight times with similar results. Source data for a-d can be found in Supplementary Table 4.

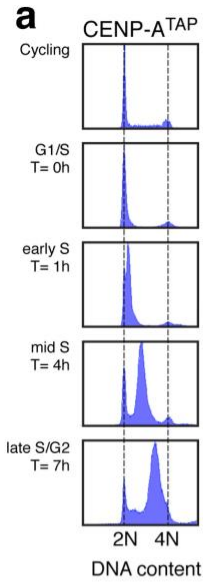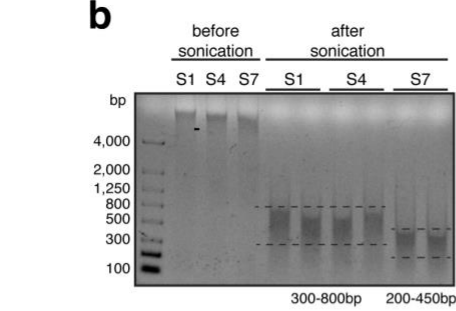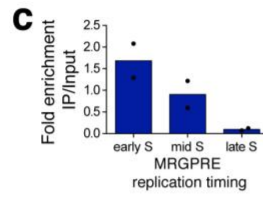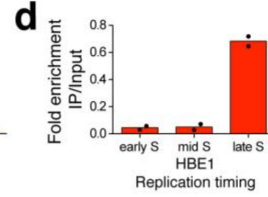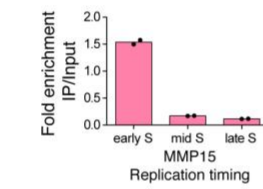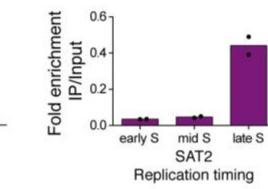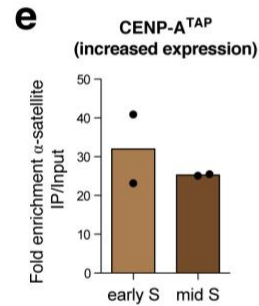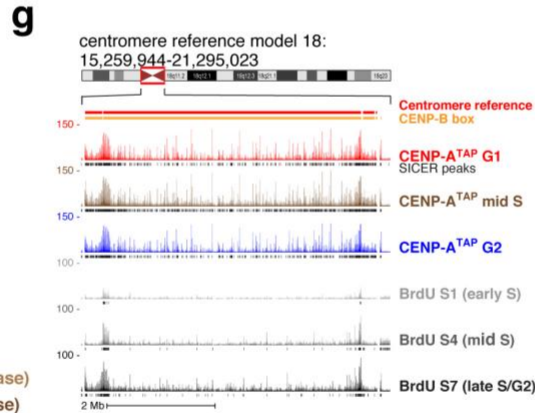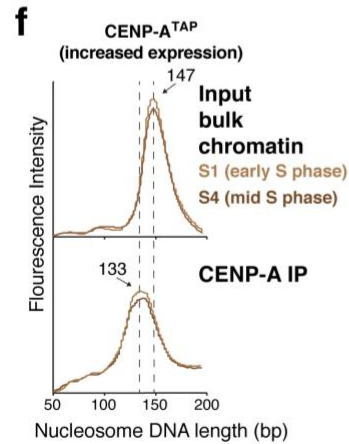

**h**

CENP-A single-mapping overlapping peaks at  $\alpha$ -satellite HORs  
CENP-A G1 (96 peaks) vs.  
CENP-A mid-S (96 peaks)  
% overlap: 100%

**j** MCM2-7 and CAF1 complexes

|          | Randomly cycling |                | late S/G2      |                |
|----------|------------------|----------------|----------------|----------------|
|          | spectra counts   | peptide counts | spectra counts | peptide counts |
| MCM2     | 0                | 0              | 15             | 11             |
| MCM3     | 19               | 10             | 26             | 15             |
| MCM4     | 27               | 11             | 31             | 23             |
| MCM5     | 20               | 9              | 30             | 17             |
| MCM6     | 17               | 8              | 16             | 8              |
| MCM7     | 71               | 22             | 79             | 32             |
| CAF1p150 | 0                | 0              | 2              | 2              |
| CAF1p48  | 37               | 8              | 19             | 12             |

**k** DNA replication related proteins

|       | Randomly cycling |                | late S/G2      |                |
|-------|------------------|----------------|----------------|----------------|
|       | spectra counts   | peptide counts | spectra counts | peptide counts |
| RFC1  | 85               | 30             | 31             | 14             |
| RFC2  | 38               | 14             | 29             | 13             |
| RFC3  | 24               | 13             | 14             | 9              |
| RFC4  | 41               | 17             | 27             | 16             |
| RFC5  | 34               | 11             | 21             | 11             |
| GIN52 | 0                | 0              | 4              | 3              |
| GIN53 | 2                | 2              | 3              | 3              |
| POLA1 | 7                | 5              | 9              | 9              |
| POLD1 | 4                | 4              | 17             | 12             |
| ORC1  | 24               | 19             | 15             | 13             |
| ORC5  | 5                | 2              | 12             | 6              |
| PCNA  | 6                | 5              | 3              | 3              |
| CDC45 | 0                | 0              | 6              | 4              |

**l** Chromatin remodeling factors and nuclear chaperon

|          | Randomly cycling |                | late S/G2      |                |
|----------|------------------|----------------|----------------|----------------|
|          | spectra counts   | peptide counts | spectra counts | peptide counts |
| HJURP    | 469              | 90             | 430            | 87             |
| NPM1     | 415              | 45             | 282            | 43             |
| RbAp46   | 29               | 13             | 19             | 11             |
| NPM3     | 10               | 5              | 8              | 3              |
| RSF1     | 306              | 79             | 73             | 39             |
| FACTp80  | 430              | 79             | 181            | 59             |
| FACTp140 | 1725             | 147            | 434            | 107            |
| DAXX     | 12               | 7              | 0              | 0              |
| NAP1L1   | 15               | 6              | 25             | 8              |
| NAP1L4   | 4                | 3              | 5              | 3              |

**m** Histones

|      | Randomly cycling |                | late S/G2      |                |
|------|------------------|----------------|----------------|----------------|
|      | spectra counts   | peptide counts | spectra counts | peptide counts |
| H2A  | 1,924            | 96             | 810            | 81             |
| H2B  | 520              | 31             | 205            | 25             |
| H3.1 | 245              | 26             | 93             | 22             |
| H4   | 737              | 48             | 396            | 66             |
| H1   | 26               | 15             | 12             | 8              |

**n** centromere and kinetochore

|                | Randomly cycling |                | late S/G2      |                |
|----------------|------------------|----------------|----------------|----------------|
|                | spectra counts   | peptide counts | spectra counts | peptide counts |
| AURKB          | 8                | 7              | 16             | 12             |
| Borealin       | 10               | 6              | 9              | 9              |
| INCENP         | 12               | 10             | 14             | 13             |
| KNL1           | 98               | 47             | 0              | 0              |
| ZWINT          | 16               | 7              | 25             | 9              |
| NDC80          | 5                | 3              | 48             | 26             |
| NUF2           | 0                | 0              | 6              | 6              |
| SPC24          | 0                | 0              | 19             | 7              |
| SPC25          | 11               | 4              | 22             | 9              |
| DSN1           | 47               | 18             | 47             | 19             |
| MIS12          | 19               | 9              | 16             | 9              |
| PMF1           | 20               | 11             | 19             | 11             |
| NSL1           | 81               | 17             | 47             | 12             |
| Mis18 $\alpha$ | 15               | 5              | 0              | 0              |
| Mis18 $\beta$  | 14               | 7              | 9              | 6              |
| Mis18bp1       | 36               | 22             | 27             | 19             |

Supplementary Figure 5

Centromeres are late replicating with CENP-A remaining tethered locally by continued binding to the CCAN complex.

**(a)** FACS analysis of DNA content showing the synchronization efficiency of CENP-A<sub>TAP</sub> HeLa cell line across S phase. The experiment was repeated independently twice with similar results. **(b)** Genomic DNA of cells labeled for 1 hour with BrdU was sonicated prior to the BrdU immunoprecipitation and fragments of 200-800bp were obtained. The experiment was repeated independently twice with similar results. Unprocessed images of DNA gels can be found in Supplementary Fig. 6. **(c)** Quantitative real-time PCR for MRGP<sub>RE</sub> and MMP15 genes, previously reported to replicate early (ref<sub>9</sub> and ENCODE Repli-seq). **(d)** Quantitative real-time PCR for HBE1 and Sat2<sub>10</sub> genes, previously reported to replicate late (ref<sub>11</sub> and ENCODE Repli-seq). **(e)** Quantitative real-time PCR for  $\alpha$ -satellite DNA. Data shown in c-e are from two biologically independent experiments. Source data for c-e can be found in Supplementary Table 4. **(f)** MNase digestion profile showing the nucleosomal DNA length distributions of bulk input mono-nucleosomes (upper panel) and purified CENP-A<sub>TAP</sub> following native ChIP at early S and mid S phase. The experiment was repeated twice independently with similar results. **(g)** CENP-A ChIP-seq raw mapping data spanning the whole of cen18 at G1, mid S phase and G2, and BrdU repli-seq at early S (S1), mid S (S4) and late S/G2 (S7). SICER peaks are denoted as black lines underneath the raw mapping data. The experiment was repeated twice independently with similar results. Centromere reference location, red. CENP-B boxes, orange. Scale bar, 2Mb. **(h)** Overlap degree between CENP-A G1 and mid-S at  $\alpha$ -satellite HORs single copy variants. **(i)** Ethidium Bromide stained DNA agarose gel showing MNase digestion profile of bulk chromatin used for mass spectrometry identification of proteins associating with CENP-A<sub>TAP</sub> chromatin (left panel) and for CENP-A<sub>TAP</sub> co-immunoprecipitation experiment (right panel). Mass spectrometry was performed once and co-IP was performed twice with similar results. Unprocessed images of DNA gels can be found in Supplementary Fig. 6. **(j-n)** CENP-A<sub>TAP</sub> immunopurification followed by mass spectrometry identifies association with CENP-A chromatin of DNA replication related proteins (**j,k**), chromatin remodeling factors and nuclear chaperones (**l**), histones (**m**) and centromere and kinetochore proteins (**n**).



Figure 7a. unprocessed images of blots

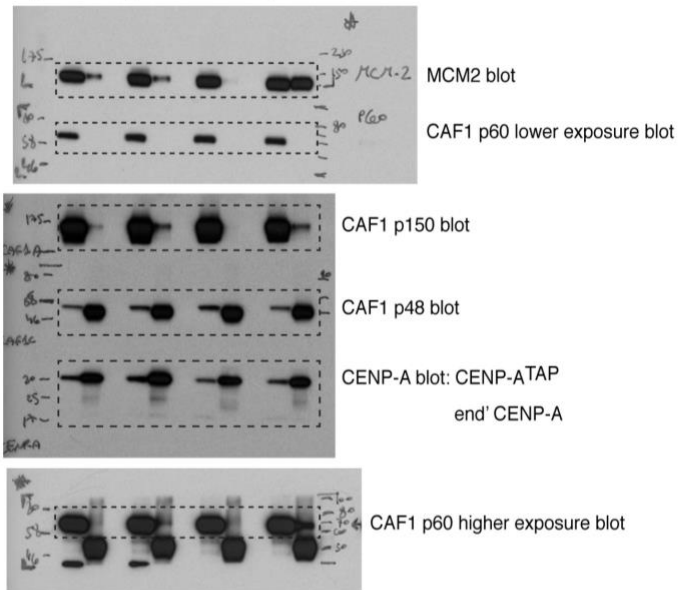

Figure S5b. unprocessed image of DNA gel  
DNA sonication for repli-seq

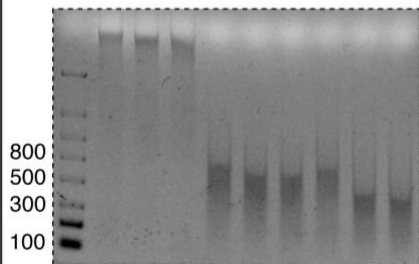

Figure S5h. unprocessed  
images of DNA gel  
MNase digestion for mass spectrometry

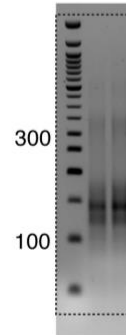

Figure S5h. unprocessed images  
of DNA gel  
MNase digestion for co-IP

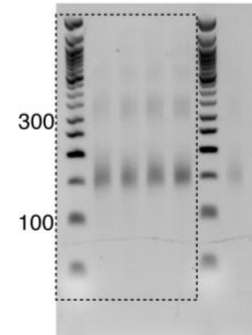

**Supplementary Figure 6**

**Unprocessed film scans of all immunoblots and DNA gels with corresponding protein and DNA size markers.**

**Supplementary Video 1. Rapid CENP-C<sub>AE/AE</sub> depletion following IAA treatment.** DLD1 CENP-C<sub>AE/AE</sub> 12 cells were treated with IAA and immediately filmed every 10 minutes. Green, CENP-C<sub>AE/AE</sub>. Magenta, DNA labeled with Sir-DNA dye. Time (in minutes) is indicated in white. The experiment was repeated four times independently with similar results.

**Supplementary Table 1. Read statistics for ChIP-seq and Repli-seq experiments.** Total number of merged paired-end read (one read per merged two paired-ends) generated for each sample in dataset, the number (and percentage) of those that were  $\geq 100$ bp in length and the number (and percentage) of reads mapping to  $\alpha$ -satellites. **Table A, B.** Read statistics for each sample in the CENP-A<sub>+LAP</sub> dataset (A) and for the combined replicates in the CENP-A<sub>+LAP</sub> dataset (D) in each condition. **Table C, D.** Read statistics for each sample in the CENP-A<sub>TAP</sub> dataset (C) and for the combined replicates in the CENP-A<sub>TAP</sub> dataset (D) in each condition. **Table E, F.** Read statistics for each sample in the BrdU Repli-seq dataset (E) and for the combined replicates in the BrdU Repli-seq dataset (F) in each condition.

**Supplementary Table 2. Endogenous CENP-A sequence mapping onto  $\alpha$ -satellite DNAs in human centromere reference models for each autosome and the X chromosome.** Centromere reference models<sup>3</sup> were generated with methods as previously described<sup>2</sup>. Length estimates are expected to be averaged across arrays from homologous chromosomes. **Column 1:** chromosome information, **column 2:** chromosome start position, **column 3:** chromosome end position, **column 4:** length in bp of each reference model as represented in the human assembly<sup>1, 3</sup>, **column 5:** Genbank accession, **columns 6:** Genomic locus, if applicable, **column 7, 8, 9:** number of reads for CENP-A<sub>LAP</sub> G1, replicate samples 1 and 2, and input, respectively, that aligned to the  $\alpha$ -satellite reference model, **columns 10, 11, 12:** relative frequency of alignment to the  $\alpha$ -satellite reference model is given for CENP-A<sub>LAP</sub> G1, replicate samples 1 and 2, and input, respectively. **Columns 13, 14:** fold-enrichment of CENP-A<sub>LAP</sub> G1, replicate samples 1 and 2 at the  $\alpha$ -satellite reference model, relative to input. A summary of the reads and bases is given for those chromosomes that have several  $\alpha$ -satellite reference models. Arrays that are identical between different chromosome locations are indicated as follows: \*Sum of three near-identical arrays on chr1, 5, and 19; \*\*Sum of two near-identical arrays on chr5, and 19; \*\*\*Sum of acrocentric near-identical arrays on chr13, 14, 21 and 22. Sequence coordinates refer to the human GRCh38 assembly.

**Supplementary Table 3. Antibodies used in the study.**

**Supplementary Table 4. Statistical source data for graphical representations.** The Statistical source data table provides the experimental data used to generate the graphical representations in the study.

## References

1. Nechemia-Arbely, Y. *et al.* Human centromeric CENP-A chromatin is a homotypic, octameric nucleosome at all cell cycle points. *J Cell Biol* **216**, 607-621 (2017).
2. Miga, K.H. *et al.* Centromere reference models for human chromosomes X and Y satellite arrays. *Genome Res* **24**, 697-707 (2014).
3. Schneider, V.A. *et al.* Evaluation of GRCh38 and de novo haploid genome assemblies demonstrates the enduring quality of the reference assembly. *Genome Res* **27**, 849-864 (2017).
4. Ly, P. *et al.* Selective Y centromere inactivation triggers chromosome shattering in micronuclei and repair by non-homologous end joining. *Nat Cell Biol* **19**, 68-75 (2017).
5. Hasson, D. *et al.* The octamer is the major form of CENP-A nucleosomes at human centromeres. *Nat Struct Mol Biol* **20**, 687-695 (2013).

6. Hasson, D. *et al.* Formation of novel CENP-A domains on tandem repetitive DNA and across chromosome breakpoints on human chromosome 8q21 neocentromeres. *Chromosoma* **120**, 621-632 (2011).
7. Thakur, J. & Henikoff, S. Unexpected conformational variations of the human centromeric chromatin complex. *Genes Dev* **32**, 20-25 (2018).
8. Henikoff, J.G., Thakur, J., Kasinathan, S. & Henikoff, S. A unique chromatin complex occupies young alpha-satellite arrays of human centromeres. *Sci Adv* **1** (2015).
9. Ryba, T., Battaglia, D., Pope, B.D., Hiratani, I. & Gilbert, D.M. Genome-scale analysis of replication timing: from bench to bioinformatics. *Nat Protoc* **6**, 870-895 (2011).
10. Ohzeki, J. *et al.* Breaking the HAC Barrier: histone H3K9 acetyl/methyl balance regulates CENP-A assembly. *Embo J* **31**, 2391-2402 (2012).
11. Hassan, K.M., Norwood, T., Gimelli, G., Gartler, S.M. & Hansen, R.S. Satellite 2 methylation patterns in normal and ICF syndrome cells and association of hypomethylation with advanced replication. *Hum Genet* **109**, 452-462 (2001).
12. Hoffmann, S. *et al.* CENP-A Is Dispensable for Mitotic Centromere Function after Initial Centromere/Kinetochore Assembly. *Cell Rep* **17**, 2394-2404 (2016).

**Table 1. Mass spectrometry of CENP-A individual nucleosomes reveal all the CCAN network components co-precipitated with CENP-A at late S/G2.** CENP-A<sup>TAP</sup> was immunoprecipitated from the chromatin fraction of randomly cycling cells or late S/G2 synchronized cells followed by mass spectrometry to identify the co-precipitated partners.

|    | Randomly cycling |                | Late S/G2      |                |    |
|----|------------------|----------------|----------------|----------------|----|
|    | Spectra counts   | Peptide counts | Spectra counts | Peptide counts |    |
|    | CENP-A           | 107            | 22             | 70             | 21 |
|    | CENP-B           | 106            | 35             | 89             | 36 |
|    | CENP-V           | 11             | 7              | 6              | 5  |
| 1  | CENP-C           | 542            | 94             | 324            | 94 |
| 2  | CENP-L           | 68             | 19             | 37             | 16 |
| 3  | CENP-N           | 96             | 31             | 61             | 31 |
| 4  | CENP-H           | 49             | 17             | 28             | 11 |
| 5  | CENP-I           | 181            | 32             | 90             | 32 |
| 6  | CENP-K           | 206            | 32             | 93             | 28 |
| 7  | CENP-M           | 22             | 7              | 14             | 6  |
| 8  | CENP-O           | 21             | 8              | 14             | 9  |
| 9  | CENP-P           | 61             | 13             | 64             | 15 |
| 10 | CENP-Q           | 65             | 22             | 52             | 22 |
| 11 | CENP-U           | 111            | 28             | 52             | 22 |
| 12 | CENP-R           | 54             | 13             | 24             | 8  |
| 13 | CENP-T           | 87             | 22             | 35             | 20 |
| 14 | CENP-W           | 0              | 0              | 5              | 3  |
| 15 | CENP-S           | 25             | 6              | 11             | 4  |
| 16 | CENP-X           | 29             | 6              | 15             | 3  |

↑  
CCAN  
↓

**Supplementary Table S1. Read statistics for ChIP-seq and Repli-seq experiments.**

Total number of merged paired-end read (one read per merged two paired-ends) generated for each sample in dataset, the number (and percentage) of those that were  $\geq 100$ bp in length and the number (and percentage) of reads mapping to  $\alpha$ -satellites. **Table A, B.** Read statistics for each sample in the CENP-A<sup>+LAP</sup> dataset (A) and for the combined replicates in the CENP-A<sup>+LAP</sup> dataset (D) in each condition. **Table C, D.** Read statistics for each sample in the CENP-A<sup>TAP</sup> dataset (C) and for the combined replicates in the CENP-A<sup>TAP</sup> dataset (D) in each condition. **Table E, F.** Read statistics for each sample in the BrdU Repli-seq dataset (E) and for the combined replicates in the BrdU Repli-seq dataset (F) in each condition.

| <b>Table A. ChIP-seq replicates statistics for CENP-A<sup>+LAP</sup> chromatin</b> |                             |                                                                         |                                                                         |                                                                                 |
|------------------------------------------------------------------------------------|-----------------------------|-------------------------------------------------------------------------|-------------------------------------------------------------------------|---------------------------------------------------------------------------------|
| <b>Experiment</b>                                                                  | <b>Repl<br/>cate<br/>No</b> | <b>Total number of<br/>merged paired-<br/>end reads<br/>(100bp x 2)</b> | <b>Total (%) number<br/>of merged reads<br/><math>\geq 100</math>bp</b> | <b>No (%) of merged<br/>reads mapping to<br/><math>\alpha</math>-satellites</b> |
| CENP-A <sup>LAP</sup><br>G1                                                        | 1                           | 37,088,538                                                              | 30,232,099 (81.5%)                                                      | 27,671,623 (74.6%)                                                              |
|                                                                                    | 2                           | 40,641,911                                                              | 33,438,763 (82.3%)                                                      | 30,342,295 (74.6%)                                                              |
| CENP-A <sup>LAP</sup><br>G2                                                        | 1                           | 39,939,734                                                              | 32,202,885 (80.6%)                                                      | 24,209,577 (60.6%)                                                              |
|                                                                                    | 2                           | 32,689,317                                                              | 25,933,735 (79.3%)                                                      | 19,566,369 (59.9%)                                                              |
| CENP-A <sup>LAP</sup><br>G1 Input                                                  | 1                           | 31,874,876                                                              | 28,835,317 (90.5%)                                                      | 952,554 (2.98%)                                                                 |
| CENP-A <sup>LAP</sup><br>G2 Input                                                  | 1                           | 74,252,732                                                              | 68,409,198 (92.1%)                                                      | 2,200,921 (2.96%)                                                               |

| <b>Table B. ChIP-seq combined replicate statistics for CENP-A<sup>+LAP</sup> chromatin</b> |                                                                    |                                                                         |                                                                                 |
|--------------------------------------------------------------------------------------------|--------------------------------------------------------------------|-------------------------------------------------------------------------|---------------------------------------------------------------------------------|
| <b>Experiment</b>                                                                          | <b>Total number of merged<br/>paired-end reads<br/>(100bp x 2)</b> | <b>Total (%) number<br/>of merged reads<br/><math>\geq 100</math>bp</b> | <b>No (%) of merged<br/>reads mapping to<br/><math>\alpha</math>-satellites</b> |
| CENP-A <sup>LAP</sup><br>G1                                                                | 77,730,449                                                         | 63,670,862 (81.9%)                                                      | 58,013,918 (74.6%)                                                              |
| CENP-A <sup>LAP</sup><br>G2                                                                | 72,629,051                                                         | 58,136,620 (79.9%)                                                      | 43,775,946 (60.2%)                                                              |

| <b>Experiment</b>              | <b>Replicate No</b> | <b>Total number of merged paired-end reads (100bp x 2)</b> | <b>Total (%) number of merged reads &gt;=100bp</b> | <b>No (%) of merged reads mapping to <math>\alpha</math>-satellites</b> |
|--------------------------------|---------------------|------------------------------------------------------------|----------------------------------------------------|-------------------------------------------------------------------------|
| CENP-A <sup>TAP</sup> RC       | 1                   | 9,436,346                                                  | 8,464,391 (89.7%)                                  | 4,588,228 (48.6%)                                                       |
|                                | 2                   | 69,039,423                                                 | 54,952,932 (79.6%)                                 | 31,053,433 (45%)                                                        |
| CENP-A <sup>TAP</sup> G1       | 1                   | 68,776,382                                                 | 54,522,683 (79.3%)                                 | 28,023,214 (40.7%)                                                      |
|                                | 2                   | 51,746,426                                                 | 40,328,176 (77.9%)                                 | 21,534,570 (41.6%)                                                      |
| CENP-A <sup>TAP</sup> mid S    | 1                   | 65,077,481                                                 | 50,476,007 (77.6%)                                 | 33,879,664 (52.1%)                                                      |
|                                | 2                   | 62,298,174                                                 | 48,772,959 (78.3%)                                 | 31,783,490 (51.0%)                                                      |
| CENP-A <sup>TAP</sup> G2       | 1                   | 49,206,313                                                 | 40,088,665 (81.5%)                                 | 25,204,739 (51.2%)                                                      |
|                                | 2                   | 60,985,667                                                 | 48,764,504 (80.0%)                                 | 33,414,704 (54.8%)                                                      |
| H3.1 <sup>TAP</sup> RC         | 1                   | 31,819,170                                                 | 27,823,087 (87.4%)                                 | 668,075 (2.1%)                                                          |
|                                | 2                   | 42,069,089                                                 | 36,187,314 (86.0%)                                 | 911,027 (2.2%)                                                          |
| CENP-A <sup>TAP</sup> RC Input | 1                   | 61,557,119                                                 | 61,612,349 (84.5%)                                 | 1,374,644 (2.2%)                                                        |
| CENP-A <sup>TAP</sup> G1 Input | 1                   | 58,262,947                                                 | 48,941,720 (84%)                                   | 1,691,920 (2.9%)                                                        |
| CENP-A <sup>TAP</sup> G2 Input | 1                   | 50,117,787                                                 | 41,826,112 (83.5%)                                 | 1,674,557 (3.34%)                                                       |

| <b>Experiment</b>           | <b>Total number of merged paired-end reads (100bp x 2)</b> | <b>Total (%) number of merged reads &gt;=100bp</b> | <b>No (%) of merged reads mapping to <math>\alpha</math>-satellites</b> |
|-----------------------------|------------------------------------------------------------|----------------------------------------------------|-------------------------------------------------------------------------|
| CENP-A <sup>TAP</sup> RC    | 78,475,769                                                 | 63,417,323 (80.8%)                                 | 35,641,661 (46.8%)                                                      |
| CENP-A <sup>TAP</sup> G1    | 120,522,808                                                | 94,850,859 (78.7%)                                 | 49,557,784 (41.2%)                                                      |
| CENP-A <sup>TAP</sup> mid S | 127,375,655                                                | 99,248,966 (77.9%)                                 | 65,663,154 (51.5%)                                                      |
| CENP-A <sup>TAP</sup> G2    | 110,191,980                                                | 88,853,169 (80.6%)                                 | 58,619,443 (53%)                                                        |
| H3.1 <sup>TAP</sup> RC      | 73,888,259                                                 | 64,010,401 (86.6%)                                 | 1,579,102 (2.15%)                                                       |

| <b>Experiment</b>        | <b>Replicate No</b> | <b>Total number of merged paired-end reads (100bp x 2)</b> | <b>Total (%) number of merged reads <math>\geq 100</math>bp</b> | <b>No (%) of merged reads mapping to <math>\alpha</math>-satellites</b> |
|--------------------------|---------------------|------------------------------------------------------------|-----------------------------------------------------------------|-------------------------------------------------------------------------|
| BrdU S1<br>Early S phase | 1                   | 48,838,225                                                 | 42,840,706 (87.7%)                                              | 144,337 (0.29%)                                                         |
|                          | 2                   | 938,746                                                    | 730,915 (77.8%)                                                 | 2,082 (0.22%)                                                           |
| BrdU S4<br>Mid S phase   | 1                   | 46,828,553                                                 | 40,991,823 (87.5%)                                              | 371,793 (0.79%)                                                         |
|                          | 2                   | 34,480,560                                                 | 31,507,686 (91.4%)                                              | 254,159 (0.73%)                                                         |
| BrdU S7<br>Late S phase  | 1                   | 40,899,839                                                 | 35,827,676 (87.6%)                                              | 1,657,902 (4.05%)                                                       |
|                          | 2                   | 41750,126                                                  | 35,667,382 (85.4%)                                              | 1,682,353 (4.03%)                                                       |
| BrdU S1 Input            | 1                   | 22,887,332                                                 | 21,177,083 (92.5%)                                              | 1,185,850 (5.2%)                                                        |
| BrdU S4 Input            | 1                   | 25,806,345                                                 | 23,810,449 (92.2%)                                              | 1,146,797 (4.4%)                                                        |
| BrdU S7 Input            | 1                   | 25,004,047                                                 | 23,205,784 (92.8%)                                              | 1,322,554 (5.3%)                                                        |

| <b>Experiment</b>        | <b>Total number of merged paired-end reads (100bp x 2)</b> | <b>Total (%) number of merged reads <math>\geq 100</math>bp</b> | <b>No (%) of merged reads mapping to <math>\alpha</math>-satellites</b> |
|--------------------------|------------------------------------------------------------|-----------------------------------------------------------------|-------------------------------------------------------------------------|
| BrdU S1<br>Early S phase | 49,776,971                                                 | 43,571,621 (82.8%)                                              | 146,419 (0.25%)                                                         |
| BrdU S4<br>Mid S phase   | 81,309,113                                                 | 72,499,509 (89.4%)                                              | 625,952 (0.76%)                                                         |
| BrdU S7<br>Late S phase  | 82,649,965                                                 | 71,495,058 (86.5%)                                              | 3,340,255 (4.04%)                                                       |

**Table S2. Endogenous CENP-A sequence mapping onto  $\alpha$ -satellite DNAs in human centromere reference models for each autosome and the X chromosome.** Centromere reference models are from Miga et al. (<sup>46</sup>, unpublished), generated with methods as previously described <sup>45</sup>. Length estimates are expected to be averaged across arrays from homologous chromosomes. **Column 1:** chromosome information, **column 2:** chromosome start position, **column 3:** chromosome end position, **column 4:** length in bp of each reference model as represented in the human assembly <sup>46,8</sup>, **column 5:** Genbank accession, **columns 6:** Genomic locus, if applicable, **column 7, 8, 9:** number of reads for CENP-A<sup>LAP</sup> G1, replicate samples 1 and 2, and input, respectively, that aligned to the  $\alpha$ -satellite reference model, **columns 10, 11, 12:** relative frequency of alignment to the  $\alpha$ -satellite reference model is given for CENP-A<sup>LAP</sup> G1, replicate samples 1 and 2, and input, respectively. **Columns 13, 14:** fold-enrichment of CENP-A<sup>LAP</sup> G1, replicate samples 1 and 2 at the  $\alpha$ -satellite reference model, relative to input. A summary of the reads and bases is given for those chromosomes that have several  $\alpha$ -satellite reference models. Arrays that are identical between different chromosome locations are indicated as follows: \*Sum of three near-identical arrays on chr1, 5, and 19; \*\*Sum of two near-identical arrays on chr5, and 19; \*\*\*Sum of acrocentric near-identical arrays on chr13, 14, 21 and 22. Sequence coordinates refer to the human GRCh38 assembly.

| hg38 chromo-<br>some<br>number | chromosome<br>coordinates<br>Start | chromosome<br>coordinates<br>End | Length<br>(bp)   | GenBank<br>Accession<br>number | Locus                   | CENP-A<br>G1-1<br>Read<br>count | CENP-A<br>G1-2<br>Read<br>count | Input<br>Read<br>count | CENP-A<br>G1-1<br>Relative<br>Frequency | CENP-A<br>G1-2<br>Relative<br>Frequency | Input<br>Relative<br>Frequency | CENP-A<br>G1-1<br>Enrichment | CENP-A<br>G1-2<br>Enrichment |
|--------------------------------|------------------------------------|----------------------------------|------------------|--------------------------------|-------------------------|---------------------------------|---------------------------------|------------------------|-----------------------------------------|-----------------------------------------|--------------------------------|------------------------------|------------------------------|
| chr1                           | 122,026,459                        | 122,224,535                      | 198,076          | GJ211836.1                     | N/A                     | 465                             | 400                             | 354                    | 1.29E-05                                | 1.05E-05                                | 1.11E-05                       | 1.16                         | 0.94                         |
| chr1                           | 122,224,635                        | 122,503,147                      | 278,512          | GJ211837.1                     | D1Z5                    | 6,636                           | 6,492                           | 2,363                  | 1.84E-04                                | 1.70E-04                                | 7.43E-05                       | 2.48                         | 2.29                         |
| chr1*                          | 122,503,247                        | 124,785,432                      | 2,282,185        | GJ212202.1                     | D1Z7/<br>D5Z2/<br>D19Z3 | 3,884,766                       | 4,104,057                       | 153,199                | 1.08E-01                                | 1.08E-01                                | 4.82E-03                       | <b>22.41</b>                 | <b>22.35</b>                 |
| chr1                           | 124,785,532                        | 124,849,129                      | 63,597           | GJ211855.1                     | N/A                     | 1,154                           | 1,189                           | 797                    | 3.21E-05                                | 3.12E-05                                | 2.51E-05                       | 1.28                         | 1.24                         |
| chr1                           | 124,849,229                        | 124,932,724                      | 83,495           | GJ211857.1                     | N/A                     | 4,408                           | 4,565                           | 965                    | 1.22E-04                                | 1.20E-04                                | 3.03E-05                       | 4.04                         | 3.95                         |
| <b>Sum<br/>chr1</b>            |                                    |                                  | <b>2,905,865</b> |                                |                         | <b>3,897,429</b>                | <b>4,116,703</b>                | <b>157,678</b>         | <b>1.08E-01</b>                         | <b>1.08E-01</b>                         | <b>4.96E-03</b>                | <b>21.84</b>                 | <b>21.78</b>                 |
| <b>chr2</b>                    | <b>92,188,145</b>                  | <b>94,090,557</b>                | <b>1,902,412</b> | <b>GJ211860.1</b>              | <b>D2Z1</b>             | <b>772,858</b>                  | <b>773,709</b>                  | <b>13,622</b>          | <b>2.15E-02</b>                         | <b>2.03E-02</b>                         | <b>4.28E-04</b>                | <b>50.14</b>                 | <b>47.39</b>                 |
| chr3                           | 90,772,458                         | 91,233,586                       | 461,128          | GJ211866.1                     | N/A                     | 3,287                           | 2,626                           | 3,396                  | 9.13E-05                                | 6.89E-05                                | 1.07E-04                       | 0.86                         | 0.65                         |
| chr3                           | 91,233,686                         | 91,247,622                       | 13,936           | GJ211867.1                     | N/A                     | 90                              | 93                              | 146                    | 2.50E-06                                | 2.44E-06                                | 4.59E-06                       | 0.54                         | 0.53                         |
| chr3                           | 91,553,419                         | 93,655,574                       | 2,102,155        | GJ211871.1                     | D3Z1                    | 726,106                         | 743,093                         | 59,085                 | 2.02E-02                                | 1.95E-02                                | 1.86E-03                       | <b>10.86</b>                 | <b>10.49</b>                 |
| <b>Sum<br/>chr3</b>            |                                    |                                  | <b>2,577,219</b> |                                |                         | <b>729,483</b>                  | <b>745,812</b>                  | <b>62,627</b>          | <b>2.03E-02</b>                         | <b>1.96E-02</b>                         | <b>1.97E-03</b>                | <b>10.29</b>                 | <b>9.94</b>                  |
| <b>chr4</b>                    | <b>49,712,061</b>                  | <b>51,743,951</b>                | <b>2,031,890</b> | <b>GJ211881.1</b>              | <b>D4Z1</b>             | <b>802,017</b>                  | <b>880,598</b>                  | <b>25,601</b>          | <b>2.23E-02</b>                         | <b>2.31E-02</b>                         | <b>8.05E-04</b>                | <b>27.69</b>                 | <b>28.70</b>                 |
| chr5                           | 46,485,900                         | 46,569,062                       | 83,162           | GJ211882.1                     | N/A                     | 1,138                           | 1,262                           | 727                    | 3.16E-05                                | 3.31E-05                                | 2.29E-05                       | 1.38                         | 1.45                         |
| chr5                           | 46,569,162                         | 46,796,725                       | 227,563          | GJ211883.1                     | N/A                     | 1,055                           | 1,064                           | 632                    | 2.93E-05                                | 2.79E-05                                | 1.99E-05                       | 1.48                         | 1.40                         |
| chr5                           | 46,796,825                         | 47,061,288                       | 264,463          | GJ211884.1                     | N/A                     | 2,175                           | 2,406                           | 1,712                  | 6.04E-05                                | 6.31E-05                                | 5.38E-05                       | 1.12                         | 1.17                         |
| chr5                           | 47,106,994                         | 47,153,339                       | 46,345           | GJ211886.1                     | N/A                     | 1,180                           | 1,321                           | 864                    | 3.28E-05                                | 3.47E-05                                | 2.72E-05                       | 1.21                         | 1.28                         |
| chr5                           | 47,153,439                         | 47,296,069                       | 142,630          | GJ211887.1                     | N/A                     | 1,589                           | 1,669                           | 361                    | 4.42E-05                                | 4.38E-05                                | 1.14E-05                       | 3.89                         | 3.86                         |



|                      |                   |                   |                  |                   |                         |                  |                  |                |                 |                 |                 |               |               |
|----------------------|-------------------|-------------------|------------------|-------------------|-------------------------|------------------|------------------|----------------|-----------------|-----------------|-----------------|---------------|---------------|
| chr5*                | 47,309,184        | 49,591,369        | 2,282,185        | GJ212203.1        | D1Z7/<br>D5Z2/<br>D19Z3 | 3,884,766        | 4,104,057        | 153,199        | 1.08E-01        | 1.08E-01        | 4.82E-03        | <b>22.41</b>  | <b>22.35</b>  |
| chr5**               | 49,667,531        | 49,721,203        | 53,672           | GJ211904.2        | N/A                     | 421              | 377              | 464            | 1.17E-05        | 9.89E-06        | 1.46E-05        | 0.80          | 0.68          |
| chr5                 | 49,721,303        | 50,059,807        | 338,504          | GJ211906.2        | N/A                     | 1,094            | 1,196            | 1,456          | 3.04E-05        | 3.14E-05        | 4.58E-05        | 0.66          | 0.69          |
| <b>Sum<br/>chr5</b>  |                   |                   | <b>3,438,524</b> |                   |                         | <b>3,893,418</b> | <b>4,113,352</b> | <b>159,415</b> | <b>1.08E-01</b> | <b>1.08E-01</b> | <b>5.01E-03</b> | <b>21.58</b>  | <b>21.53</b>  |
| <b>chr6</b>          | <b>58,553,888</b> | <b>59,829,934</b> | <b>1,276,046</b> | <b>GJ211907.1</b> | <b>D6Z1</b>             | <b>1,240,000</b> | <b>1,360,728</b> | <b>41,164</b>  | <b>3.45E-02</b> | <b>3.57E-02</b> | <b>1.29E-03</b> | <b>26.62</b>  | <b>27.58</b>  |
| chr7                 | 58,169,653        | 60,828,234        | 2,658,581        | GJ211908.1        | D7Z1                    | 987,890          | 1,080,834        | 25,905         | 2.75E-02        | 2.84E-02        | 8.15E-04        | <b>33.70</b>  | <b>34.81</b>  |
| chr7                 | 61,377,788        | 61,528,020        | 150,232          | GJ212194.1        | D7Z2                    | 1,818            | 1,897            | 890            | 5.05E-05        | 4.98E-05        | 2.80E-05        | 1.81          | 1.78          |
| <b>Sum<br/>chr7</b>  |                   |                   | <b>2,808,813</b> |                   |                         | <b>989,708</b>   | <b>1,082,731</b> | <b>26,795</b>  | <b>2.75E-02</b> | <b>2.84E-02</b> | <b>8.43E-04</b> | <b>32.64</b>  | <b>33.71</b>  |
| <b>chr8</b>          | <b>44,033,744</b> | <b>45,877,265</b> | <b>1,843,521</b> | <b>GJ211909.1</b> | <b>D8Z2</b>             | <b>962,237</b>   | <b>1,055,322</b> | <b>21,112</b>  | <b>2.67E-02</b> | <b>2.77E-02</b> | <b>6.64E-04</b> | <b>40.28</b>  | <b>41.70</b>  |
| <b>chr9</b>          | <b>43,389,635</b> | <b>45,518,558</b> | <b>2,128,923</b> | <b>GJ211929.1</b> | <b>D9Z4</b>             | <b>726,448</b>   | <b>801,194</b>   | <b>16,178</b>  | <b>2.02E-02</b> | <b>2.10E-02</b> | <b>5.09E-04</b> | <b>39.68</b>  | <b>41.32</b>  |
| chr10                | 39,686,682        | 39,935,900        | 249,218          | GJ211930.1        | N/A                     | 215,957          | 211,519          | 859            | 6.00E-03        | 5.55E-03        | 2.70E-05        | <b>222.18</b> | <b>205.43</b> |
| chr10                | 39,936,000        | 41,497,440        | 1,561,440        | GJ211932.1        | D10Z1                   | 503,166          | 508,384          | 14,260         | 1.40E-02        | 1.33E-02        | 4.48E-04        | 31.18         | 29.74         |
| chr10                | 41,497,540        | 41,545,720        | 48,180           | GJ211933.1        | N/A                     | 18,519           | 16,696           | 1,314          | 5.15E-04        | 4.38E-04        | 4.13E-05        | 12.46         | 10.60         |
| chr10                | 41,545,820        | 41,593,521        | 47,701           | GJ211936.1        | N/A                     | 4,002            | 3,829            | 1,465          | 1.11E-04        | 1.00E-04        | 4.61E-05        | 2.41          | 2.18          |
| <b>Sum<br/>chr10</b> |                   |                   | <b>1,906,539</b> |                   |                         | <b>741,644</b>   | <b>740,428</b>   | <b>17,898</b>  | <b>2.06E-02</b> | <b>1.94E-02</b> | <b>5.63E-04</b> | <b>36.62</b>  | <b>34.51</b>  |
| chr11                | 51,078,348        | 51,090,317        | 11,969           | GJ211938.1        | N/A                     | 63               | 23               | 29             | 1.75E-06        | 6.03E-07        | 9.12E-07        | 1.92          | 0.66          |
| chr11                | 51,090,417        | 54,342,399        | 3,251,982        | GJ211943.1        | D11Z1                   | 811,562          | 827,321          | 35,762         | 2.26E-02        | 2.17E-02        | 1.12E-03        | <b>20.06</b>  | <b>19.30</b>  |
| chr11                | 54,342,499        | 54,425,074        | 82,575           | GJ211948.1        | N/A                     | 74,089           | 75,567           | 2,855          | 2.06E-03        | 1.98E-03        | 8.98E-05        | <b>22.93</b>  | <b>22.08</b>  |
| <b>Sum<br/>chr11</b> |                   |                   | <b>3,346,526</b> |                   |                         | <b>885,714</b>   | <b>902,911</b>   | <b>38,646</b>  | <b>2.46E-02</b> | <b>2.37E-02</b> | <b>1.22E-03</b> | <b>20.25</b>  | <b>19.49</b>  |
| chr12                | 34,769,407        | 34,816,611        | 47,204           | GJ211949.1        | N/A                     | 773              | 477              | 274            | 2.15E-05        | 1.25E-05        | 8.62E-06        | 2.49          | 1.45          |
| chr12                | 34,835,295        | 37,185,252        | 2,349,957        | GJ211954.1        | D12Z3                   | 1,559,732        | 1,576,847        | 59,791         | 4.33E-02        | 4.14E-02        | 1.88E-03        | <b>23.05</b>  | <b>22.00</b>  |
| <b>Sum<br/>chr12</b> |                   |                   | <b>2,397,161</b> |                   |                         | <b>1,560,505</b> | <b>1,577,324</b> | <b>60,065</b>  | <b>4.34E-02</b> | <b>4.14E-02</b> | <b>1.89E-03</b> | <b>22.96</b>  | <b>21.91</b>  |
| chr13***             | 16,000,000        | 16,022,537        | 22,537           | GJ211955.2        | N/A                     | 417              | 417              | 429            | 1.16E-05        | 1.09E-05        | 1.35E-05        | 0.86          | 0.81          |
| chr13***             | 16,022,637        | 16,110,659        | 88,022           | GJ211961.2        | N/A                     | 556              | 529              | 587            | 1.54E-05        | 1.39E-05        | 1.85E-05        | 0.84          | 0.75          |
| chr13***             | 16,110,759        | 16,164,892        | 54,133           | GJ211962.2        | N/A                     | 2,684            | 2,706            | 3,491          | 7.46E-05        | 7.10E-05        | 1.10E-04        | 0.68          | 0.65          |
| chr13***             | 16,164,992        | 16,228,527        | 63,535           | GJ211963.2        | N/A                     | 1,392            | 1,369            | 1,549          | 3.87E-05        | 3.59E-05        | 4.87E-05        | 0.79          | 0.74          |
| chr13***             | 16,228,627        | 16,249,297        | 20,670           | GJ211965.2        | N/A                     | 1,621            | 1,627            | 1,914          | 4.50E-05        | 4.27E-05        | 6.02E-05        | 0.75          | 0.71          |
| chr13***             | 16,249,397        | 16,256,067        | 6,670            | GJ211967.2        | N/A                     | 2,773            | 2,699            | 1,877          | 7.71E-05        | 7.08E-05        | 5.90E-05        | 1.31          | 1.20          |

|                      |            |            |                  |            |                                      |                  |                  |               |                 |                 |                 |              |              |
|----------------------|------------|------------|------------------|------------|--------------------------------------|------------------|------------------|---------------|-----------------|-----------------|-----------------|--------------|--------------|
| chr13***             | 16,256,167 | 16,259,412 | 3,245            | GJ211968.2 | N/A                                  | 64               | 61               | 53            | 1.78E-06        | 1.60E-06        | 1.67E-06        | 1.07         | 0.96         |
| chr13***             | 16,259,512 | 16,282,073 | 22,561           | GJ211969.2 | N/A                                  | 290              | 294              | 274           | 8.06E-06        | 7.71E-06        | 8.62E-06        | 0.94         | 0.90         |
| chr13***             | 16,282,173 | 17,416,384 | 1,134,211        | GJ211972.2 | N/A                                  | 2,485,354        | 2,490,600        | 50,193        | 6.91E-02        | 6.53E-02        | 1.58E-03        | <b>43.76</b> | <b>41.40</b> |
| chr13***             | 17,416,484 | 17,416,824 | 340              | GJ212205.1 | N/A                                  | 12               | 15               | 1             | 3.33E-07        | 3.93E-07        | 3.14E-08        | <b>10.60</b> | <b>12.51</b> |
| chr13***             | 17,416,924 | 17,417,264 | 340              | GJ212206.1 | N/A                                  | 29               | 34               | 1             | 8.06E-07        | 8.92E-07        | 3.14E-08        | <b>25.63</b> | <b>28.37</b> |
| chr13***             | 17,417,364 | 17,418,562 | 1,198            | GJ211986.2 | N/A                                  | 576              | 563              | 432           | 1.60E-05        | 1.48E-05        | 1.36E-05        | 1.18         | 1.09         |
| chr13***             | 17,418,662 | 18,051,248 | 632,586          | GJ211991.2 | D13Z1/<br>D21Z1<br>alphaRI,<br>L1.26 | 1,535,634        | 1,543,548        | 24,960        | 4.27E-02        | 4.05E-02        | 7.85E-04        | <b>54.37</b> | <b>51.59</b> |
| <b>Sum<br/>chr13</b> |            |            | <b>2,050,048</b> |            |                                      | <b>4,031,402</b> | <b>4,044,462</b> | <b>85,761</b> | <b>1.12E-01</b> | <b>1.06E-01</b> | <b>2.70E-03</b> | <b>41.54</b> | <b>39.34</b> |
| chr14***             | 16,000,000 | 16,022,537 | 22,537           | GJ211992.2 | N/A                                  | 417              | 417              | 429           | 1.16E-05        | 1.09E-05        | 1.35E-05        | 0.86         | 0.81         |
| chr14***             | 16,140,627 | 16,228,649 | 88,022           | GJ211998.2 | N/A                                  | 556              | 529              | 587           | 1.54E-05        | 1.39E-05        | 1.85E-05        | 0.84         | 0.75         |
| chr14***             | 16,228,749 | 16,282,882 | 54,133           | GJ211999.2 | N/A                                  | 2,684            | 2,706            | 3,491         | 7.46E-05        | 7.10E-05        | 1.10E-04        | 0.68         | 0.65         |
| chr14***             | 16,282,982 | 16,346,517 | 63,535           | GJ212000.2 | N/A                                  | 1,392            | 1,369            | 1,549         | 3.87E-05        | 3.59E-05        | 4.87E-05        | 0.79         | 0.74         |
| chr14***             | 16,346,617 | 16,367,287 | 20,670           | GJ212002.2 | N/A                                  | 1,621            | 1,627            | 1,914         | 4.50E-05        | 4.27E-05        | 6.02E-05        | 0.75         | 0.71         |
| chr14***             | 16,367,387 | 16,374,057 | 6,670            | GJ212004.2 | N/A                                  | 2,773            | 2,699            | 1,877         | 7.71E-05        | 7.08E-05        | 5.90E-05        | 1.31         | 1.20         |
| chr14***             | 16,374,157 | 16,377,402 | 3,245            | GJ212005.2 | N/A                                  | 64               | 61               | 53            | 1.78E-06        | 1.60E-06        | 1.67E-06        | 1.07         | 0.96         |
| chr14***             | 16,377,502 | 16,400,063 | 22,561           | GJ212006.2 | N/A                                  | 290              | 294              | 274           | 8.06E-06        | 7.71E-06        | 8.62E-06        | 0.94         | 0.90         |
| chr14***             | 16,404,448 | 17,538,659 | 1,134,211        | GJ212009.2 | N/A                                  | 2,485,354        | 2,490,600        | 50,193        | 6.91E-02        | 6.53E-02        | 1.58E-03        | <b>43.76</b> | <b>41.40</b> |
| chr14***             | 17,538,759 | 17,539,099 | 340              | GJ212210.1 | N/A                                  | 12               | 15               | 1             | 3.33E-07        | 3.93E-07        | 3.14E-08        | <b>10.60</b> | <b>12.51</b> |
| chr14***             | 17,539,199 | 17,539,539 | 340              | GJ212211.1 | N/A                                  | 29               | 34               | 1             | 8.06E-07        | 8.92E-07        | 3.14E-08        | <b>25.63</b> | <b>28.37</b> |
| chr14***             | 17,539,639 | 17,540,837 | 1,198            | GJ212023.2 | N/A                                  | 576              | 563              | 432           | 1.60E-05        | 1.48E-05        | 1.36E-05        | 1.18         | 1.09         |
| chr14***             | 17,540,937 | 18,173,523 | 632,586          | GJ212028.2 | N/A                                  | 1,535,634        | 1,543,548        | 24,960        | 4.27E-02        | 4.05E-02        | 7.85E-04        | <b>54.37</b> | <b>51.59</b> |
| <b>Sum<br/>chr14</b> |            |            | <b>2,050,048</b> |            |                                      | <b>4,031,402</b> | <b>4,044,462</b> | <b>85,761</b> | <b>1.12E-01</b> | <b>1.06E-01</b> | <b>2.70E-03</b> | <b>41.54</b> | <b>39.34</b> |
| chr15                | 17,083,673 | 17,498,951 | 415,278          | GJ212036.1 | N/A                                  | 1,740            | 1,718            | 1,281         | 4.83E-05        | 4.51E-05        | 4.03E-05        | 1.20         | 1.12         |
| chr15                | 17,499,051 | 18,355,008 | 855,957          | GJ212042.1 | N/A                                  | 9,617            | 9,910            | 4,554         | 2.67E-04        | 2.60E-04        | 1.43E-04        | 1.87         | 1.82         |
| chr15                | 18,355,108 | 19,725,254 | 1,370,146        | GJ212045.1 | D15Z3                                | 1,195,175        | 1,187,663        | 14,547        | 3.32E-02        | 3.12E-02        | 4.57E-04        | <b>72.61</b> | <b>68.11</b> |
| <b>Sum<br/>chr15</b> |            |            | <b>2,641,381</b> |            |                                      | <b>1,206,532</b> | <b>1,199,291</b> | <b>20,382</b> | <b>3.35E-02</b> | <b>3.15E-02</b> | <b>6.41E-04</b> | <b>52.31</b> | <b>49.09</b> |
| chr16                | 36,311,158 | 36,334,460 | 23,302           | GJ212046.1 | N/A                                  | 419              | 387              | 147           | 1.16E-05        | 1.02E-05        | 4.62E-06        | 2.52         | 2.20         |

|                  |            |            |                  |            |                         |                  |                  |                |                 |                 |                 |              |              |
|------------------|------------|------------|------------------|------------|-------------------------|------------------|------------------|----------------|-----------------|-----------------|-----------------|--------------|--------------|
| chr16            | 36,337,666 | 38,265,669 | 1,928,003        | GJ212051.1 | D16Z2                   | 857,505          | 872,514          | 19,641         | 2.38E-02        | 2.29E-02        | 6.18E-04        | <b>38.58</b> | <b>37.06</b> |
| <b>Sum chr16</b> |            |            | <b>1,951,305</b> |            |                         | <b>857,924</b>   | <b>872,901</b>   | <b>19,788</b>  | <b>2.38E-02</b> | <b>2.29E-02</b> | <b>6.22E-04</b> | <b>38.32</b> | <b>36.80</b> |
| chr17            | 22,813,679 | 23,194,918 | 381,239          | GJ212053.1 | D17Z1B                  | 48,160           | 47,722           | 2,792          | 1.34E-03        | 1.25E-03        | 8.78E-05        | <b>15.24</b> | <b>14.26</b> |
| chr17            | 23,195,018 | 26,566,633 | 3,371,615        | GJ212054.1 | D17Z1                   | 358,116          | 338,203          | 11,231         | 9.95E-03        | 8.87E-03        | 3.53E-04        | <b>28.18</b> | <b>25.12</b> |
| chr17            | 26,566,733 | 26,616,164 | 49,431           | GJ212055.1 | N/A                     | 87,241           | 90,634           | 2,765          | 2.42E-03        | 2.38E-03        | 8.69E-05        | <b>27.88</b> | <b>27.35</b> |
| <b>Sum chr17</b> |            |            | <b>3,802,285</b> |            |                         | <b>493,517</b>   | <b>476,559</b>   | <b>16,788</b>  | <b>1.37E-02</b> | <b>1.25E-02</b> | <b>5.28E-04</b> | <b>25.98</b> | <b>23.68</b> |
| chr18            | 15,460,899 | 15,780,377 | 319,478          | GJ212060.1 | N/A                     | 16,312           | 15,458           | 2,974          | 4.53E-04        | 4.05E-04        | 9.35E-05        | 4.85         | 4.34         |
| chr18            | 15,797,855 | 20,561,439 | 4,763,584        | GJ212062.1 | D18Z1                   | 530,474          | 534,958          | 16,477         | 1.47E-02        | 1.40E-02        | 5.18E-04        | <b>28.45</b> | <b>27.09</b> |
| chr18            | 20,603,247 | 20,696,289 | 93,042           | GJ212066.1 | D18Z2                   | 2,198            | 2,120            | 737            | 6.11E-05        | 5.56E-05        | 2.32E-05        | 2.64         | 2.40         |
| chr18            | 20,696,389 | 20,736,025 | 39,636           | GJ212067.1 | N/A                     | 503              | 386              | 127            | 1.40E-05        | 1.01E-05        | 3.99E-06        | 3.50         | 2.54         |
| chr18            | 20,736,125 | 20,813,083 | 76,958           | GJ212069.1 | N/A                     | 812              | 650              | 170            | 2.26E-05        | 1.71E-05        | 5.35E-06        | 4.22         | 3.19         |
| chr18            | 20,839,797 | 20,861,206 | 21,409           | GJ212071.1 | N/A                     | 120              | 92               | 32             | 3.33E-06        | 2.41E-06        | 1.01E-06        | 3.31         | 2.40         |
| <b>Sum chr18</b> |            |            | <b>5,314,107</b> |            |                         | <b>550,419</b>   | <b>553,664</b>   | <b>20,517</b>  | <b>1.53E-02</b> | <b>1.45E-02</b> | <b>6.45E-04</b> | <b>23.71</b> | <b>22.51</b> |
| chr19**          | 24,498,980 | 24,552,652 | 53,672           | GJ212072.2 | N/A                     | 421              | 377              | 464            | 1.17E-05        | 9.89E-06        | 1.46E-05        | 0.80         | 0.68         |
| chr19            | 24,552,752 | 24,891,256 | 338,504          | GJ212077.2 | N/A                     | 1,176            | 1,165            | 1,617          | 3.27E-05        | 3.06E-05        | 5.08E-05        | 0.64         | 0.60         |
| chr19*           | 24,908,689 | 27,190,874 | 2,282,185        | GJ212201.1 | D12Z/<br>D5Z2/<br>D19Z3 | 3,884,766        | 4,104,057        | 153,199        | 1.08E-01        | 1.08E-01        | 4.82E-03        | <b>22.41</b> | <b>22.35</b> |
| <b>Sum chr19</b> |            |            | <b>2,674,361</b> |            |                         | <b>3,886,363</b> | <b>4,105,599</b> | <b>155,280</b> | <b>1.08E-01</b> | <b>1.08E-01</b> | <b>4.88E-03</b> | <b>22.12</b> | <b>22.06</b> |
| chr20            | 26,436,232 | 26,586,955 | 150,723          | GJ212091.1 | N/A                     | 8,724            | 6,977            | 2,142          | 2.42E-04        | 1.83E-04        | 6.73E-05        | 3.60         | 2.72         |
| chr20            | 26,608,145 | 28,494,539 | 1,886,394        | GJ212093.1 | D20Z2                   | 578,724          | 588,963          | 11,545         | 1.61E-02        | 1.54E-02        | 3.63E-04        | <b>44.30</b> | <b>42.56</b> |
| chr20            | 28,508,997 | 28,556,953 | 47,956           | GJ212095.1 | N/A                     | 3,688            | 3,180            | 2,219          | 1.02E-04        | 8.34E-05        | 6.98E-05        | 1.47         | 1.20         |
| chr20            | 28,648,108 | 28,728,874 | 80,766           | GJ212105.1 | N/A                     | 279              | 276              | 378            | 7.75E-06        | 7.24E-06        | 1.19E-05        | 0.65         | 0.61         |
| chr20            | 29,125,793 | 29,204,668 | 78,875           | GJ212107.1 | N/A                     | 174              | 136              | 204            | 4.83E-06        | 3.57E-06        | 6.41E-06        | 0.75         | 0.56         |
| chr20            | 29,917,404 | 30,038,348 | 120,944          | GJ212117.1 | N/A                     | 379              | 246              | 297            | 1.05E-05        | 6.45E-06        | 9.34E-06        | 1.13         | 0.69         |
| <b>Sum chr20</b> |            |            | <b>2,365,658</b> |            |                         | <b>591,968</b>   | <b>599,778</b>   | <b>16,785</b>  | <b>1.64E-02</b> | <b>1.57E-02</b> | <b>5.28E-04</b> | <b>31.17</b> | <b>29.81</b> |
| chr21***         | 10,864,560 | 10,887,097 | 22,537           | GJ212118.2 | N/A                     | 417              | 417              | 429            | 1.16E-05        | 1.09E-05        | 1.35E-05        | 0.86         | 0.81         |
| chr21***         | 10,887,197 | 10,975,219 | 88,022           | GJ212124.2 | N/A                     | 556              | 529              | 587            | 1.54E-05        | 1.39E-05        | 1.85E-05        | 0.84         | 0.75         |
| chr21***         | 10,975,319 | 11,029,452 | 54,133           | GJ212125.2 | N/A                     | 2,684            | 2,706            | 3,491          | 7.46E-05        | 7.10E-05        | 1.10E-04        | 0.68         | 0.65         |
| chr21***         | 11,029,552 | 11,093,087 | 63,535           | GJ212126.2 | N/A                     | 1,392            | 1,369            | 1,549          | 3.87E-05        | 3.59E-05        | 4.87E-05        | 0.79         | 0.74         |

|                      |                   |                   |                  |                   |                                      |                  |                  |               |                 |                 |                 |              |              |
|----------------------|-------------------|-------------------|------------------|-------------------|--------------------------------------|------------------|------------------|---------------|-----------------|-----------------|-----------------|--------------|--------------|
| chr21***             | 11,093,187        | 11,113,857        | 20,670           | GJ212128.2        | N/A                                  | 1,621            | 1,627            | 1,914         | 4.50E-05        | 4.27E-05        | 6.02E-05        | 0.75         | 0.71         |
| chr21***             | 11,113,957        | 11,120,627        | 6,670            | GJ212130.2        | N/A                                  | 2,773            | 2,699            | 1,877         | 7.71E-05        | 7.08E-05        | 5.90E-05        | 1.31         | 1.20         |
| chr21***             | 11,120,727        | 11,123,972        | 3,245            | GJ212131.2        | N/A                                  | 64               | 61               | 53            | 1.78E-06        | 1.60E-06        | 1.67E-06        | 1.07         | 0.96         |
| chr21***             | 11,124,072        | 11,146,633        | 22,561           | GJ212132.2        | N/A                                  | 290              | 294              | 274           | 8.06E-06        | 7.71E-06        | 8.62E-06        | 0.94         | 0.90         |
| chr21***             | 11,146,733        | 12,280,944        | 1,134,211        | GJ212135.2        | N/A                                  | 2,485,354        | 2,490,600        | 50,193        | 6.91E-02        | 6.53E-02        | 1.58E-03        | <b>43.76</b> | <b>41.40</b> |
| chr21***             | 12,281,044        | 12,281,384        | 340              | GJ212204.1        | N/A                                  | 12               | 15               | 1             | 3.33E-07        | 3.93E-07        | 3.14E-08        | <b>10.60</b> | <b>12.51</b> |
| chr21***             | 12,281,484        | 12,281,824        | 340              | GJ212207.1        | N/A                                  | 29               | 34               | 1             | 8.06E-07        | 8.92E-07        | 3.14E-08        | <b>25.63</b> | <b>28.37</b> |
| chr21***             | 12,281,924        | 12,283,122        | 1,198            | GJ212149.2        | N/A                                  | 576              | 563              | 432           | 1.60E-05        | 1.48E-05        | 1.36E-05        | 1.18         | 1.09         |
| chr21***             | 12,283,222        | 12,915,808        | 632,586          | GJ212154.2        | D13Z1/<br>D21Z1<br>alphaRI,<br>L1.26 | 1,535,634        | 1,543,548        | 24,960        | 4.27E-02        | 4.05E-02        | 7.85E-04        | <b>54.37</b> | <b>51.59</b> |
| <b>Sum<br/>chr21</b> |                   |                   | <b>2,050,048</b> |                   |                                      | <b>4,031,402</b> | <b>4,044,462</b> | <b>85,761</b> | <b>1.12E-01</b> | <b>1.06E-01</b> | <b>2.70E-03</b> | <b>41.54</b> | <b>39.34</b> |
| chr22***             | 12,954,788        | 12,977,325        | 22,537           | GJ212155.2        | N/A                                  | 417              | 417              | 429           | 1.16E-05        | 1.09E-05        | 1.35E-05        | 0.86         | 0.81         |
| chr22***             | 13,021,422        | 13,109,444        | 88,022           | GJ212161.2        | N/A                                  | 556              | 529              | 587           | 1.54E-05        | 1.39E-05        | 1.85E-05        | 0.84         | 0.75         |
| chr22***             | 13,109,544        | 13,163,677        | 54,133           | GJ212162.2        | N/A                                  | 2,684            | 2,706            | 3,491         | 7.46E-05        | 7.10E-05        | 1.10E-04        | 0.68         | 0.65         |
| chr22***             | 13,163,777        | 13,227,312        | 63,535           | GJ212163.2        | N/A                                  | 1,392            | 1,369            | 1,549         | 3.87E-05        | 3.59E-05        | 4.87E-05        | 0.79         | 0.74         |
| chr22***             | 13,227,412        | 13,248,082        | 20,670           | GJ212165.2        | N/A                                  | 1,621            | 1,627            | 1,914         | 4.50E-05        | 4.27E-05        | 6.02E-05        | 0.75         | 0.71         |
| chr22***             | 13,248,182        | 13,254,852        | 6,670            | GJ212167.2        | N/A                                  | 2,773            | 2,699            | 1,877         | 7.71E-05        | 7.08E-05        | 5.90E-05        | 1.31         | 1.20         |
| chr22***             | 13,254,952        | 13,258,197        | 3,245            | GJ212168.2        | N/A                                  | 64               | 61               | 53            | 1.78E-06        | 1.60E-06        | 1.67E-06        | 1.07         | 0.96         |
| chr22***             | 13,258,297        | 13,280,858        | 22,561           | GJ212169.2        | N/A                                  | 290              | 294              | 274           | 8.06E-06        | 7.71E-06        | 8.62E-06        | 0.94         | 0.90         |
| chr22***             | 13,285,243        | 14,419,454        | 1,134,211        | GJ212172.2        | N/A                                  | 2,485,354        | 2,490,600        | 50,193        | 6.91E-02        | 6.53E-02        | 1.58E-03        | <b>43.76</b> | <b>41.40</b> |
| chr22***             | 14,419,554        | 14,419,894        | 340              | GJ212208.1        | N/A                                  | 12               | 15               | 1             | 3.33E-07        | 3.93E-07        | 3.14E-08        | <b>10.60</b> | <b>12.51</b> |
| chr22***             | 14,419,994        | 14,420,334        | 340              | GJ212209.1        | N/A                                  | 29               | 34               | 1             | 8.06E-07        | 8.92E-07        | 3.14E-08        | <b>25.63</b> | <b>28.37</b> |
| chr22***             | 14,420,434        | 14,421,632        | 1,198            | GJ212186.2        | N/A                                  | 576              | 563              | 432           | 1.60E-05        | 1.48E-05        | 1.36E-05        | 1.18         | 1.09         |
| chr22***             | 14,421,732        | 15,054,318        | 632,586          | GJ212191.2        | N/A                                  | 1,535,634        | 1,543,548        | 24,960        | 4.27E-02        | 4.05E-02        | 7.85E-04        | <b>54.37</b> | <b>51.59</b> |
| <b>Sum<br/>chr22</b> |                   |                   | <b>2,050,048</b> |                   |                                      | <b>4,031,402</b> | <b>4,044,462</b> | <b>85,761</b> | <b>1.12E-01</b> | <b>1.06E-01</b> | <b>2.70E-03</b> | <b>41.54</b> | <b>39.34</b> |
| <b>chrX</b>          | <b>58,605,579</b> | <b>62,412,542</b> | <b>3,806,963</b> | <b>GJ212192.1</b> | <b>DXZ1</b>                          | <b>725,621</b>   | <b>794,981</b>   | <b>17,185</b> | <b>2.02E-02</b> | <b>2.09E-02</b> | <b>5.40E-04</b> | <b>37.32</b> | <b>38.59</b> |

| <b>Primary antibodies</b>        |                |                                |                              |                           |                                                             |
|----------------------------------|----------------|--------------------------------|------------------------------|---------------------------|-------------------------------------------------------------|
| <b>Antibody</b>                  | <b>Species</b> | <b>Assay and dilution</b>      | <b>Source</b>                | <b>Catalogue</b>          | <b>Validation</b>                                           |
| BrdU                             | Mouse          | Repli-seq                      | Becton-Dickinson Biosciences | CAT # 555627              | used for Repli-seq previously (Hansen et al., 2010)         |
| GFP                              | Mouse          | CENP-A <sup>LAP</sup> ChIP-seq | MSKCC antibody core facility | clone 19C8 and clone 19F7 | validated previously by us and others                       |
| rabbit IgG                       | rabbit         | CENP-A <sup>TAP</sup> ChIP-seq | Sigma-Aldrich                | CAT # I5006               | validated previously by us (Foltz et al., 2006) and others  |
| CENP-A                           | rabbit         | Immunoblot 1:1,000             | Cell Signaling Technology    | CAT # 2186                | validated in Fig. 6o, also previously used by us and others |
| CENP-A                           | mouse          | ChIP                           | Abcam                        | CAT # Ab13939             | used for ChIP previously (Hasson et al., 2013)              |
| CAF1p150                         | rabbit         | Immunoblot 1:500               | Santa Cruz                   | CAT # sc-10772            | validated in Fig. 6o; also see manufacturer's data sheet    |
| CAF1p60                          | rabbit         | Immunoblot 1:1,000             | Bethyl Laboratories          | CAT # A301-085A           | validated in Fig. 6o; also see manufacturer's data sheet    |
| CAF1p48                          | rabbit         | Immunoblot 1:1,000             | Bethyl Laboratories          | CAT # A301-206A           | validated in Fig. 6o; also see manufacturer's data sheet    |
| MCM2                             | rabbit         | Immunoblot 1:1,000             | Abcam                        | CAT # Ab4461              | validated in Fig. 6o; also see manufacturer's data sheet    |
| CENP-B                           | rabbit         | Immunofluorescence 1:1,000     | Abcam                        | CAT # 25734               | validated in Fig. S1d and previously by us and others       |
| GFP                              | Mouse          | Immunofluorescence 1:500       | Roche                        | CAT # 11814460001         | validated in Fig. S1c and previously by us and others       |
| anti-centromere antibodies (ACA) | human          | Immunofluorescence 1:500       | Antibodies Inc               | CAT # 15-234-0001         | validated in Fig. S1c and previously by us and others       |
| <b>Secondary antibodies</b>      |                |                                |                              |                           |                                                             |
| <b>Antibody</b>                  | <b>Species</b> | <b>Dilution</b>                | <b>Source</b>                | <b>Catalogue number</b>   |                                                             |
| Sheep anti-mouse HRP             | sheep          | Immunoblot 1:4,000             | GE Healthcare                | NA931V                    |                                                             |
| donkey anti-rabbit HRP           | donkey         | Immunoblot 1:4,000             | GE Healthcare                | NA934V                    |                                                             |
| donkey anti-human TR             | donkey         | Immunofluorescence 1:300       | Jackson Laboratories         | CAT # 709-075-149         |                                                             |
| donkey anti-mouse FITC           | donkey         | Immunofluorescence 1:250       | Jackson Laboratories         | CAT # 715-095-151         |                                                             |
| FITC-rabbit IgG                  | rabbit         | Immunofluorescence 1:200       | Jackson Laboratories         | CAT # 011-090-003         |                                                             |
